# Supplementary material for: Synthesis and In Vitro Evaluation as Potential Anticancer and Antioxidant Agents of Diphenylamine-Pyrrolidin-2-one-Hydrazone Derivatives
Source: MDPI journal article supplement (doi:10.3390/ijms242316804), 2023-11-27
Supplement: s1 [file s1]

# Synthesis and In Vitro Evaluation as Potential Anticancer and Antioxidant Agents of Diphenylamine-Pyrrolidin-2-one-Hydrazone Derivatives

Irma Zubrickė<sup>1</sup>, Ilona Jonuškienė<sup>1</sup>, Kristina Kantminienė<sup>2\*</sup>, Ingrida Tumosienė<sup>1</sup>, and Vilma Petrikaitė<sup>3,4\*</sup>

<sup>1</sup> Department of Organic Chemistry, Kaunas University of Technology, Radvilėnų pl. 19, 50254 Kaunas, Lithuania;

<sup>2</sup> Department of Physical and Inorganic Chemistry, Kaunas University of Technology, Radvilėnų pl. 19, 50254 Kaunas, Lithuania;

<sup>3</sup> Laboratory of Drug Targets Histopathology, Institute of Cardiology, Lithuanian University of Health Sciences, Sukilėlių pr. 13, 50162 Kaunas, Lithuania;

<sup>4</sup> Institute of Biotechnology, Life Sciences Center, Vilnius University, Saulėtekio al. 7, 10257 Vilnius, Lithuania

\* Correspondence: vilma.petrikaite@gmail.com (VP); kristina.kantminiene@ktu.lt (KK)

2

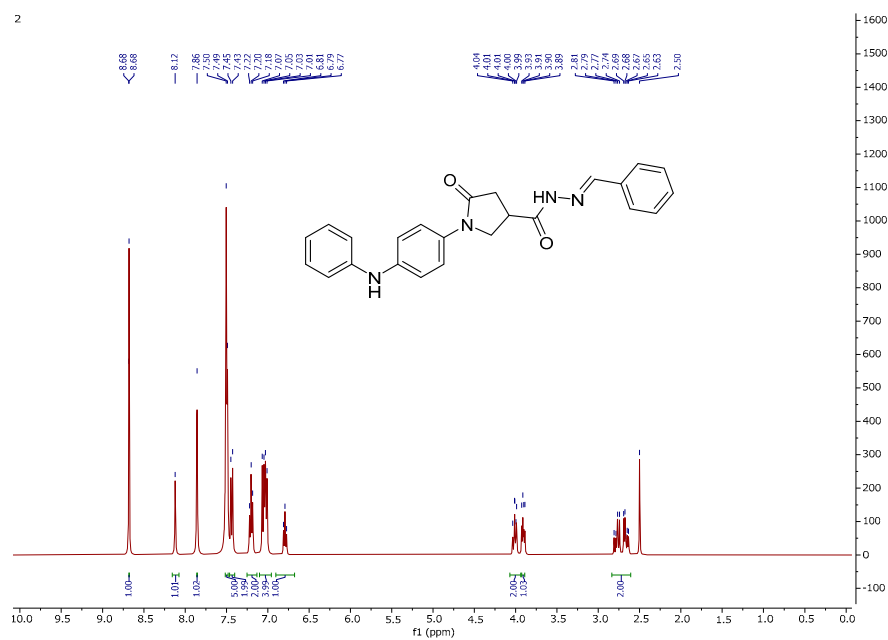

**Figure S1.**  $^1\text{H}$  NMR (400 MHz,  $\text{DMSO-d}_6$ ) spectrum of **2**

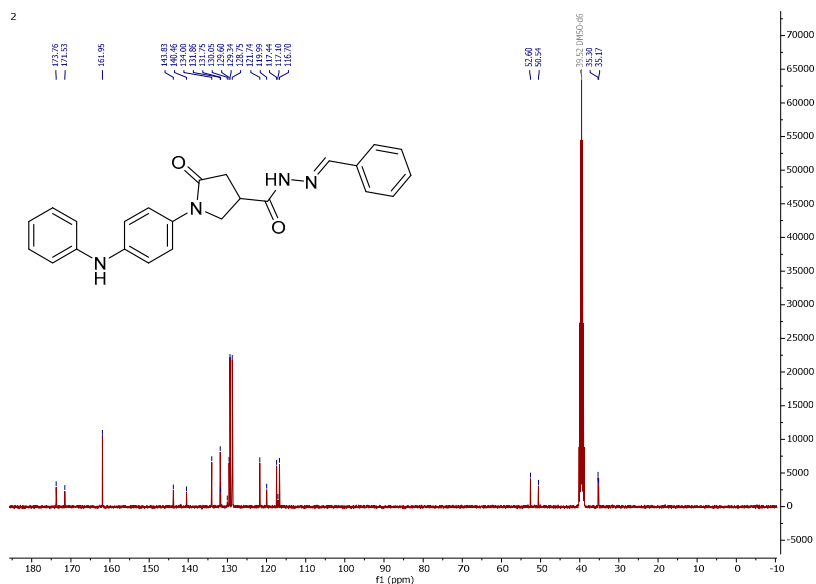

**Figure S2.**  $^{13}\text{C}$  NMR (101 MHz,  $\text{DMSO-d}_6$ ) spectrum of **2**

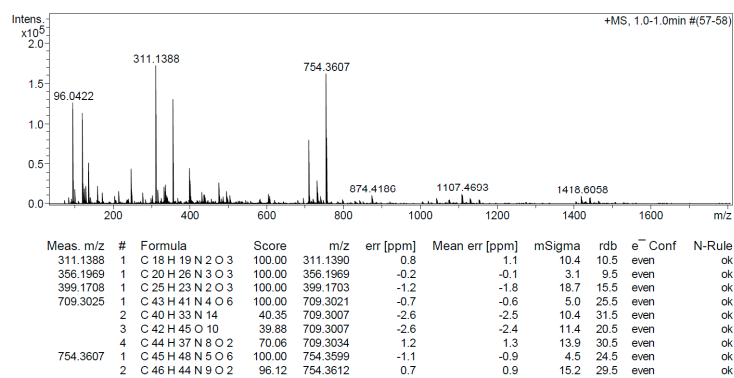

**Figure S3.** HRMS spectrum of **2**

3

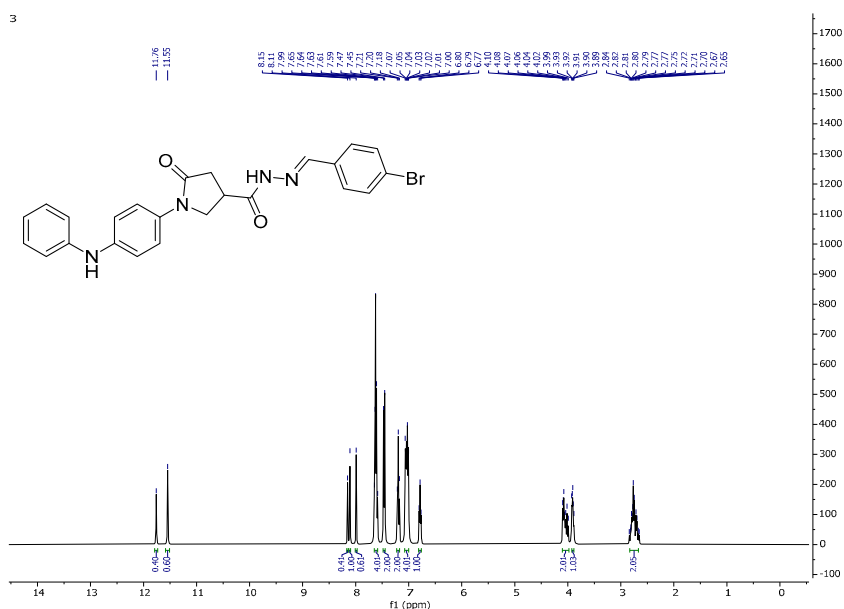

Figure S4.  $^1\text{H}$  NMR (400 MHz,  $\text{DMSO}-d_6$ ) spectrum of **3**

3

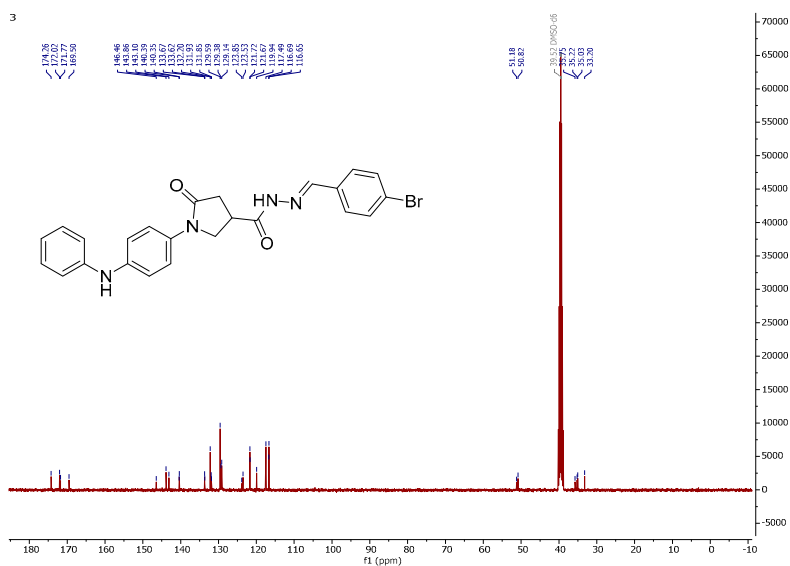

Figure S5.  $^{13}\text{C}$  NMR (101 MHz,  $\text{DMSO}-d_6$ ) spectrum of **3**

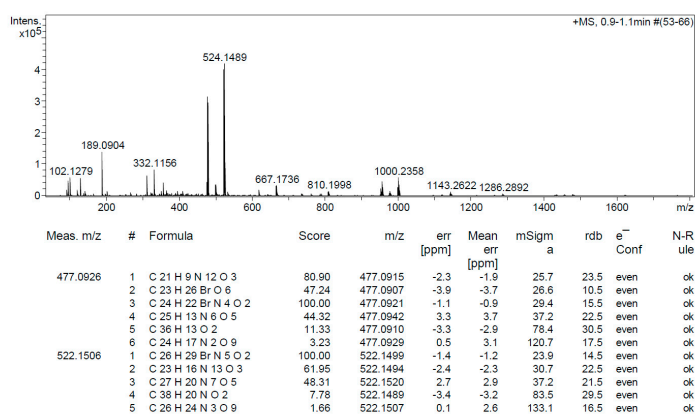

Figure S6. HRMS spectrum of **3**



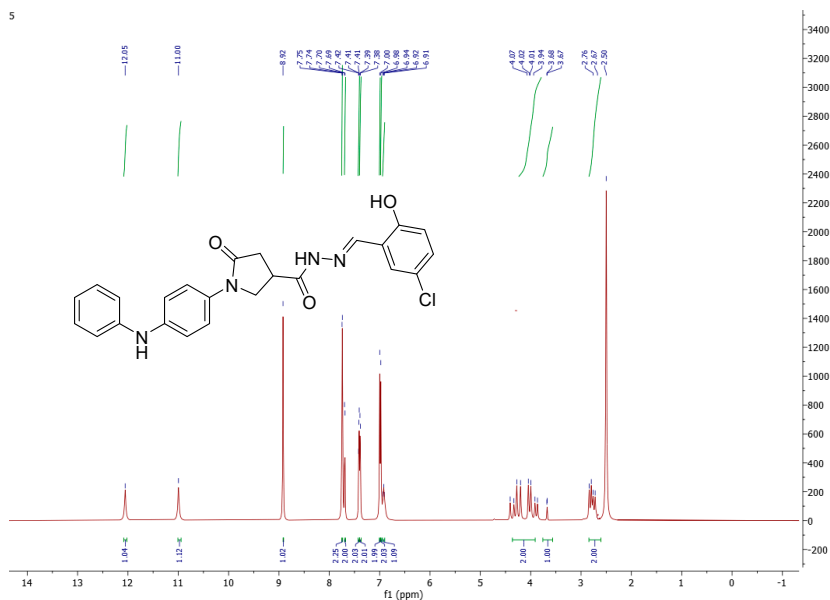

**Figure S10.**  $^1\text{H}$  NMR (400 MHz,  $\text{DMSO-d}_6$ ) spectrum of **5**

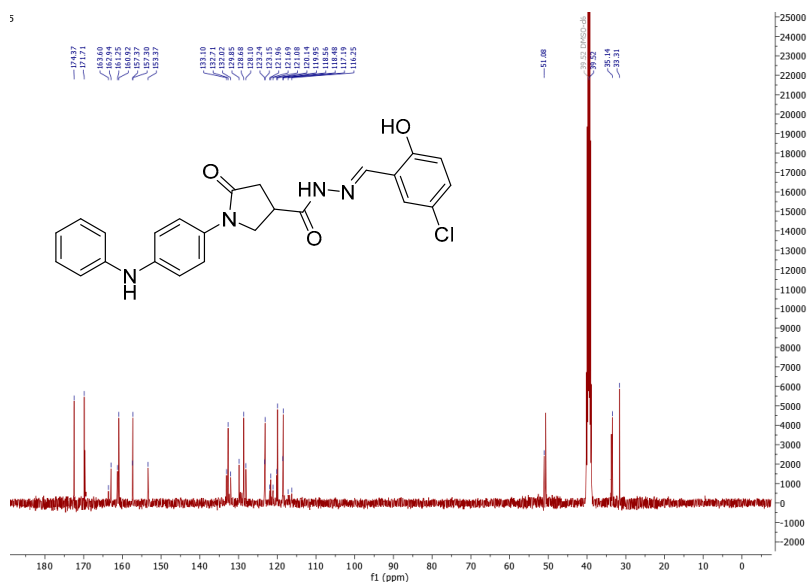

**Figure S11.**  $^{13}\text{C}$  NMR (101 MHz,  $\text{DMSO-d}_6$ ) spectrum of **5**

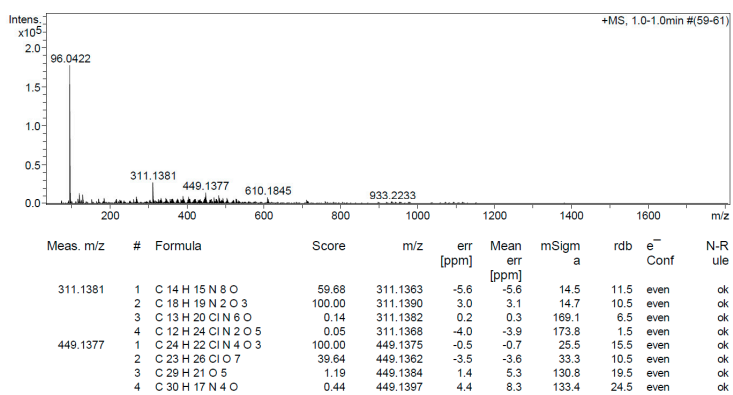

**Figure S12.** HRMS spectrum of **5**

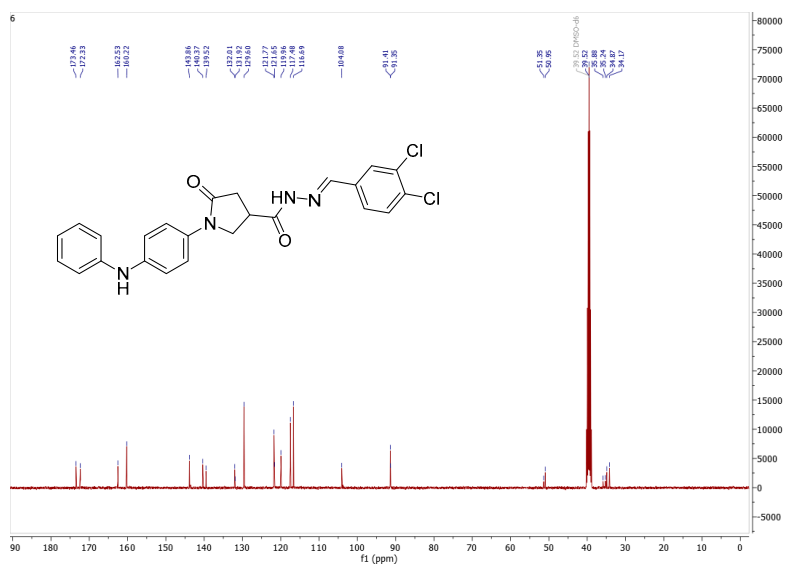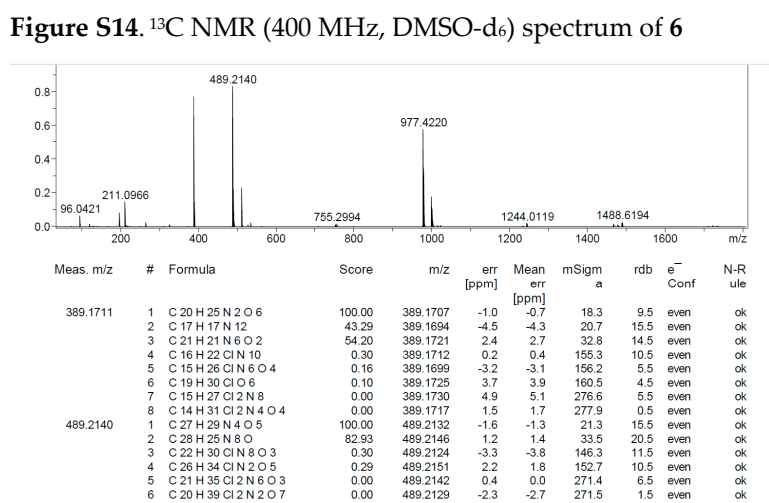

**Figure S16.**  $^1\text{H}$  NMR (400 MHz,  $\text{DMSO-d}_6$ ) spectrum of **7**

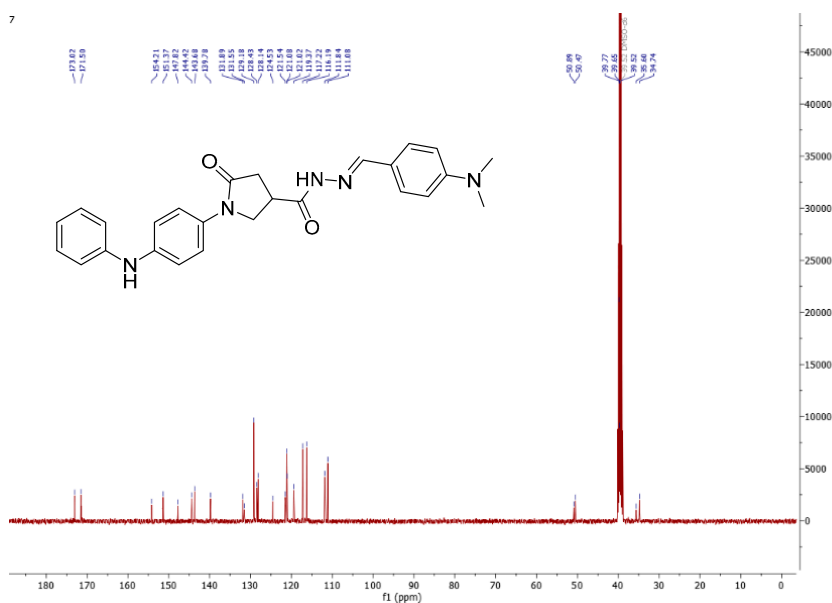

**Figure S17.**  $^{13}\text{C}$  NMR (101 MHz, DMSO- $d_6$ ) spectrum of **7**

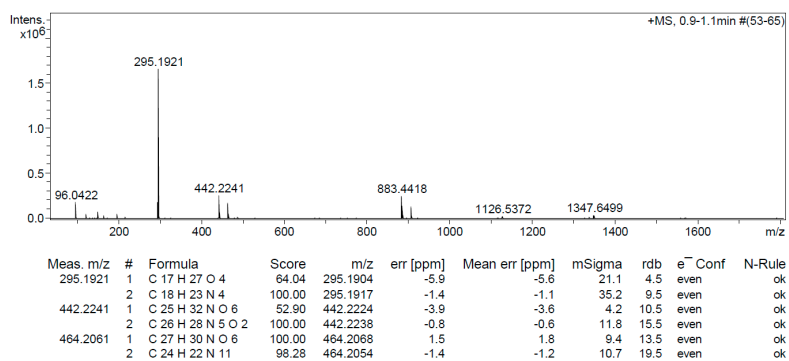

| Meas. m/z | # | Formula         | Score  | m/z      | err [ppm] | Mean err [ppm] | mSigma | rdb  | e <sup>-</sup> Conf | N-Rule |
|-----------|---|-----------------|--------|----------|-----------|----------------|--------|------|---------------------|--------|
| 295.1921  | 1 | C 17 H 27 O 4   | 64.04  | 295.1904 | -5.9      | -5.6           | 21.1   | 4.5  | even                | ok     |
|           | 2 | C 18 H 23 N 4   | 100.00 | 295.1917 | -1.4      | -1.1           | 35.2   | 9.5  | even                | ok     |
| 442.2241  | 1 | C 25 H 32 N O 6 | 52.90  | 442.2224 | -3.9      | -3.6           | 4.2    | 10.5 | even                | ok     |
|           | 2 | C 26 H 28 S O 2 | 100.00 | 442.2238 | -0.8      | -0.6           | 11.8   | 15.5 | even                | ok     |
| 464.2061  | 1 | C 27 H 30 N O 6 | 100.00 | 464.2068 | 1.5       | 1.8            | 9.4    | 13.5 | even                | ok     |
|           | 2 | C 24 H 22 N 11  | 98.28  | 464.2054 | -1.4      | -1.2           | 10.7   | 19.5 | even                | ok     |

**Figure S18.** HRMS spectrum of **7**

**Figure S19.**  $^1\text{H}$  NMR (400 MHz, DMSO- $\text{d}_6$ ) spectrum of **8**

**Figure S20.**  $^{13}\text{C}$  NMR (101 MHz, DMSO- $d_6$ ) spectrum of **8**

Mass spectrum plot showing intensity (x10<sup>6</sup>) versus m/z. The x-axis ranges from 200 to 1800 m/z. The y-axis ranges from 0.0 to 2.0 x10<sup>6</sup>. Major peaks are labeled at m/z 269.1655 (base peak), 383.2447, 96.0422, and 971.4957. The plot is titled '+MS, 0.9-1.0min #[54-59]'.

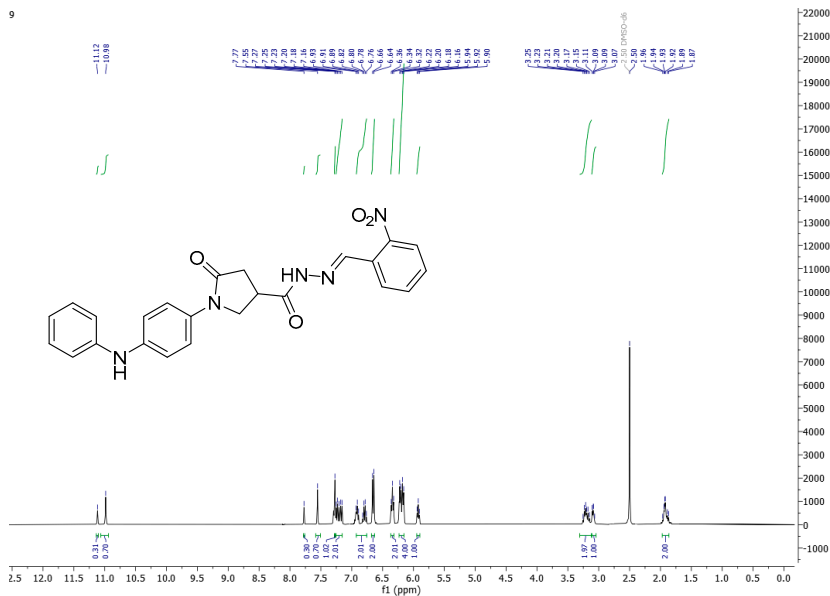

**Figure S22.** <sup>1</sup>H NMR (400 MHz, DMSO-d<sub>6</sub>) spectrum of 9

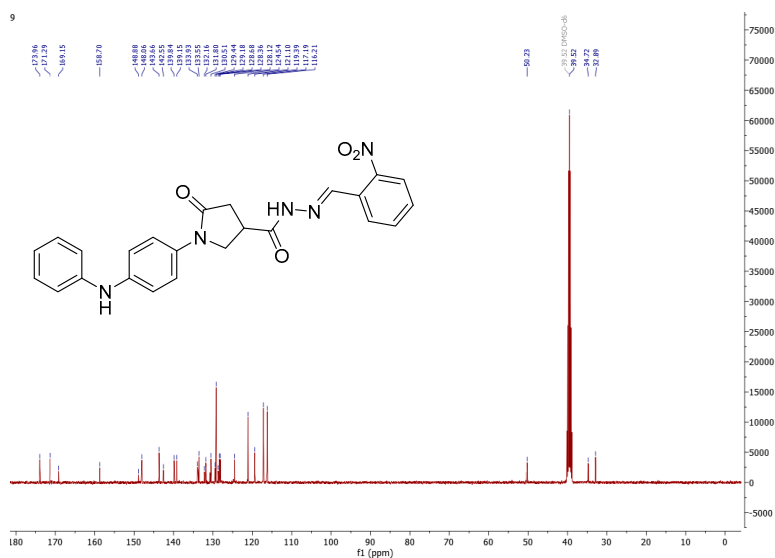

**Figure S23.** <sup>13</sup>C NMR (101 MHz, DMSO-d<sub>6</sub>) spectrum of 9

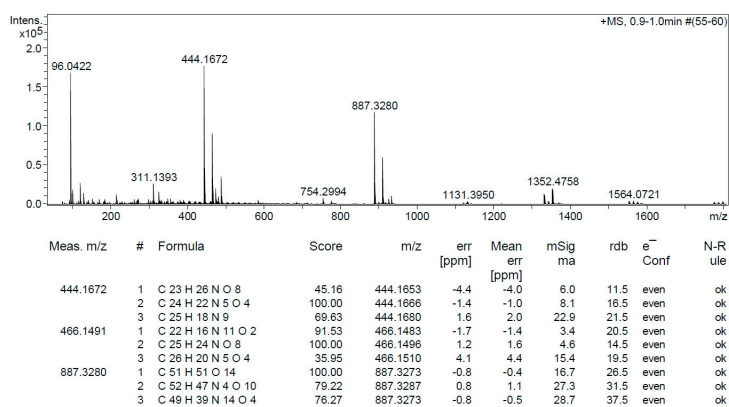

**Figure S24.** HRMS spectrum of 9



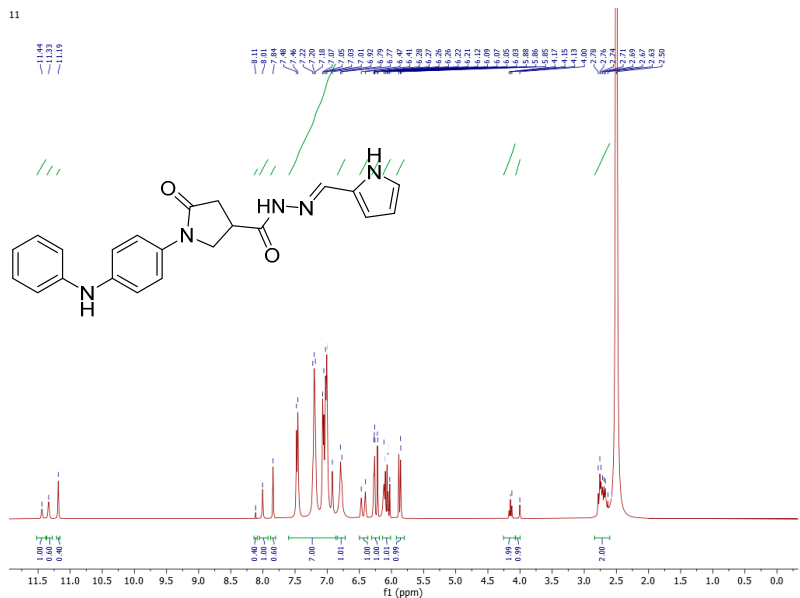

**Figure S28.** <sup>1</sup>H NMR (400 MHz, DMSO-d<sub>6</sub>) spectrum of **11**

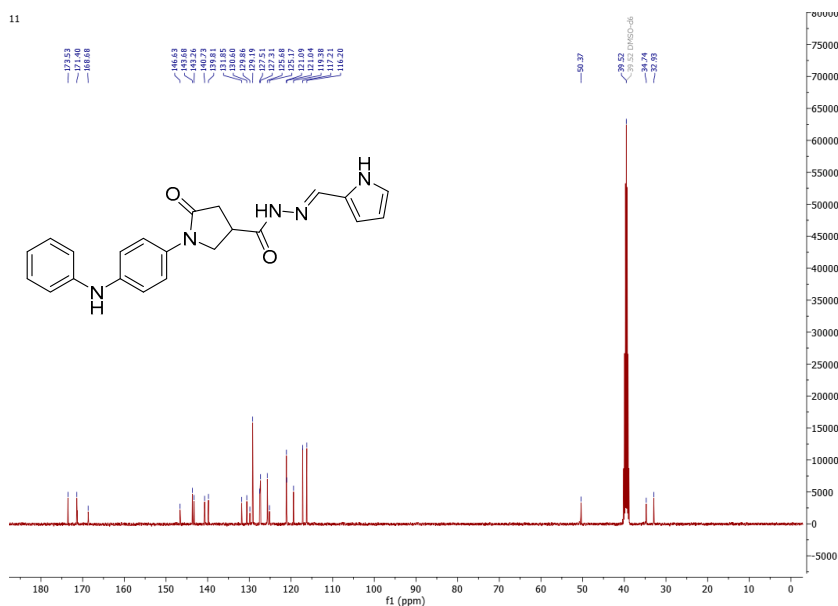

**Figure S29.** <sup>13</sup>C NMR (101 MHz, DMSO-d<sub>6</sub>) spectrum of **11**

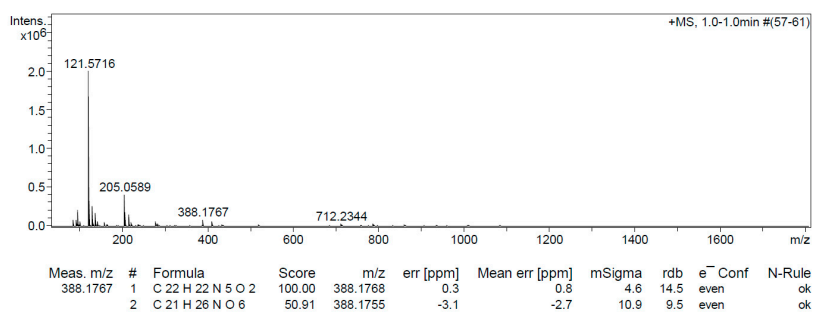

**Figure S30.** HRMS spectrum of **11**

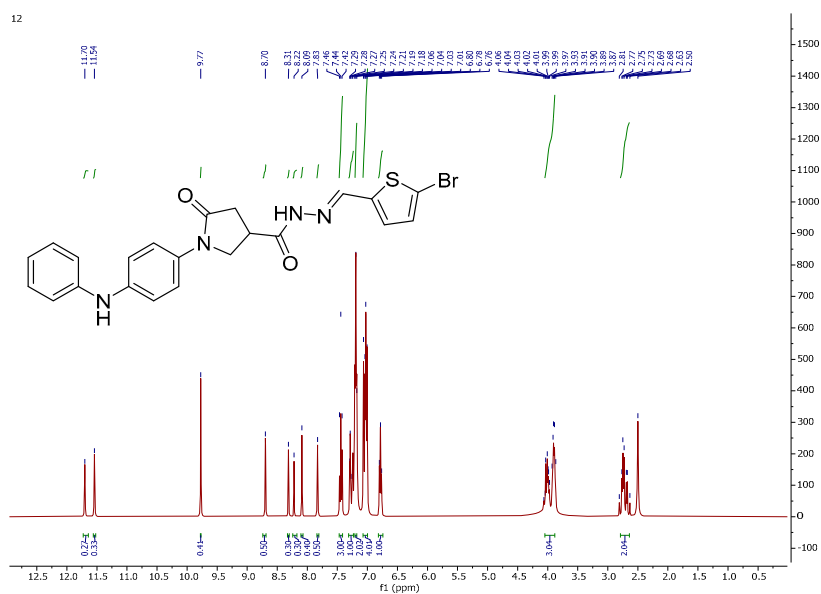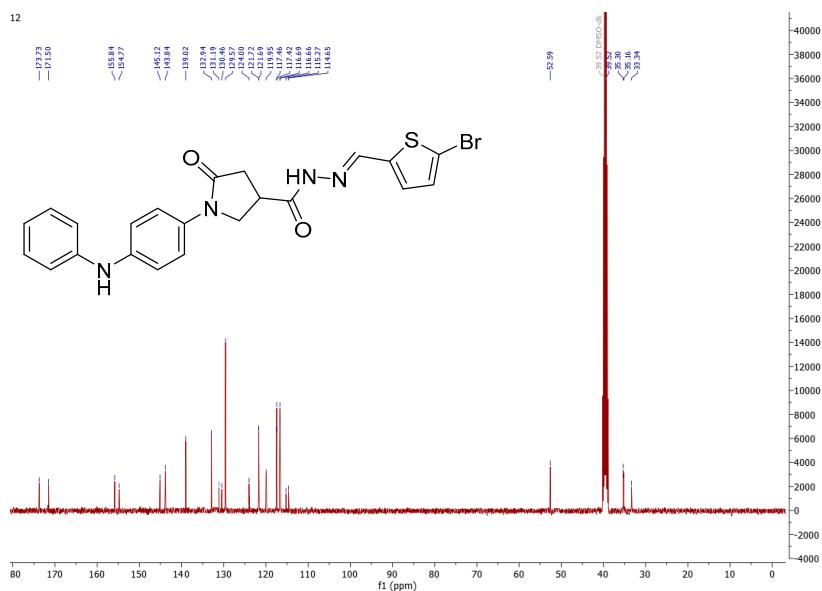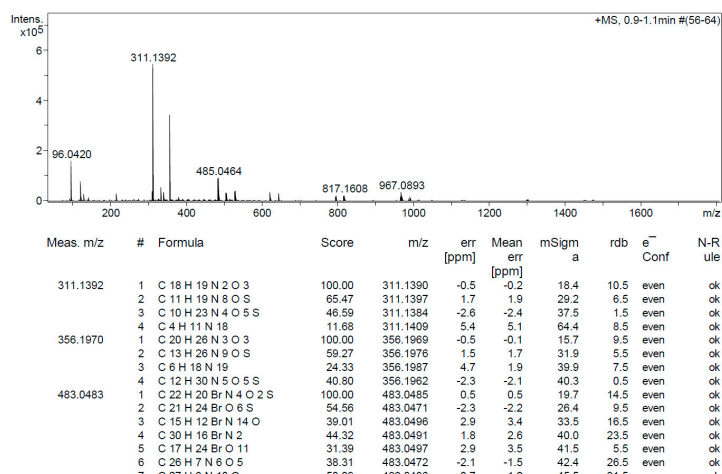

**Figure S33.** HRMS spectrum of 12

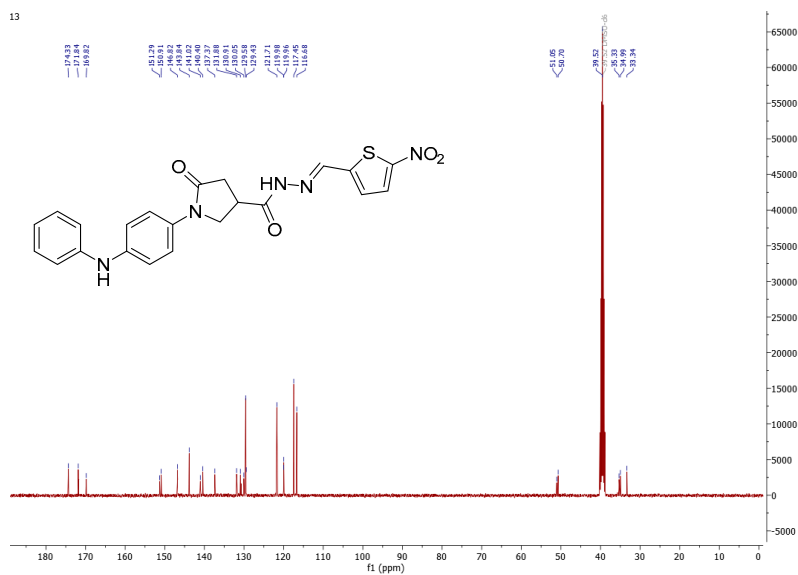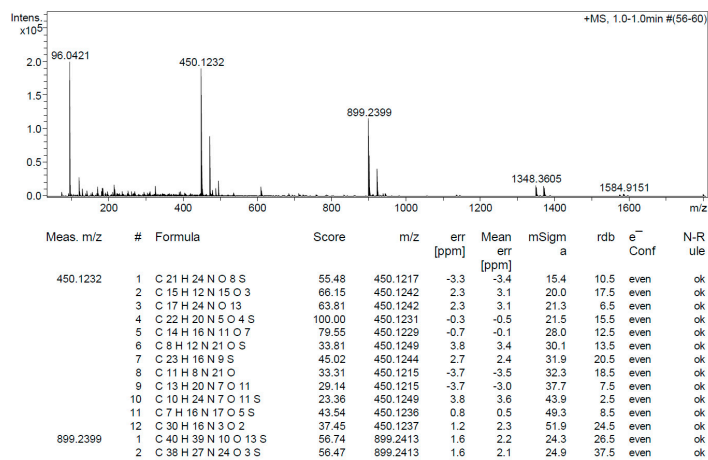

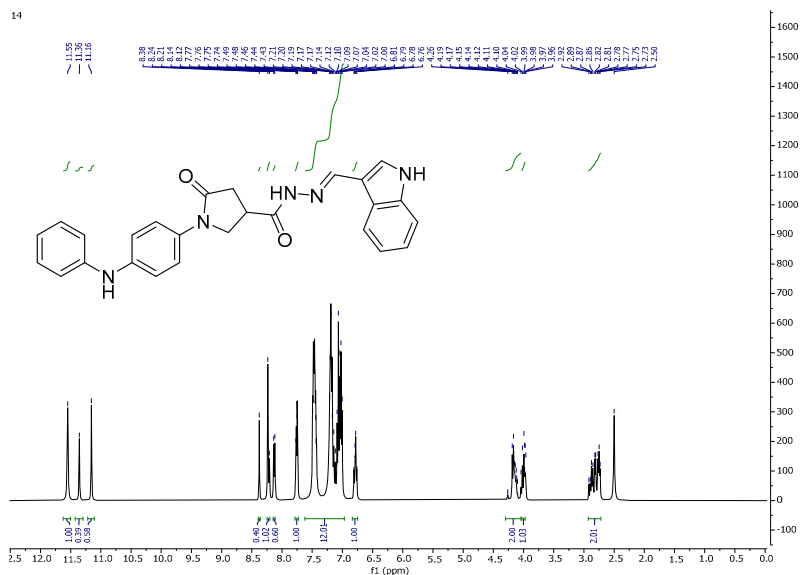

Figure S37. <sup>1</sup>H NMR (400 MHz, DMSO-d<sub>6</sub>) spectrum of 14

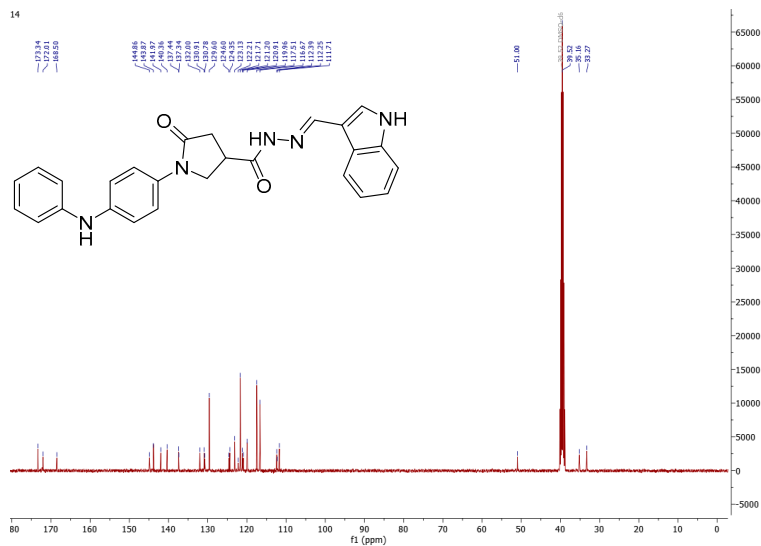

Figure S38. <sup>13</sup>C NMR (101 MHz, DMSO-d<sub>6</sub>) spectrum of 14

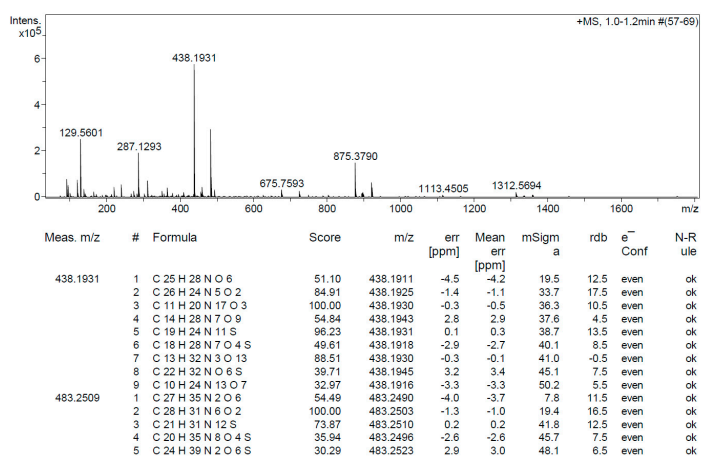

Figure S39. HRMS spectrum of 14

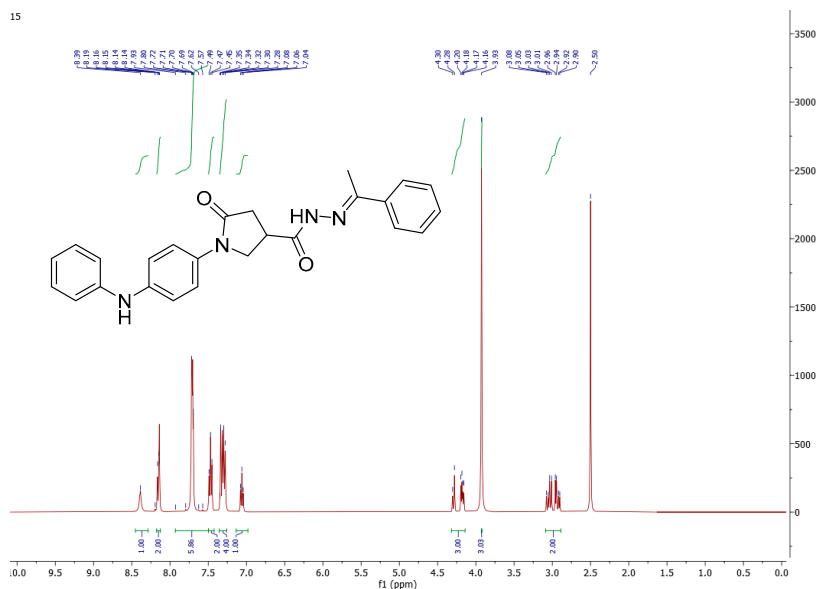

Figure S40. <sup>1</sup>H NMR (400 MHz, DMSO-d<sub>6</sub>) spectrum of 15

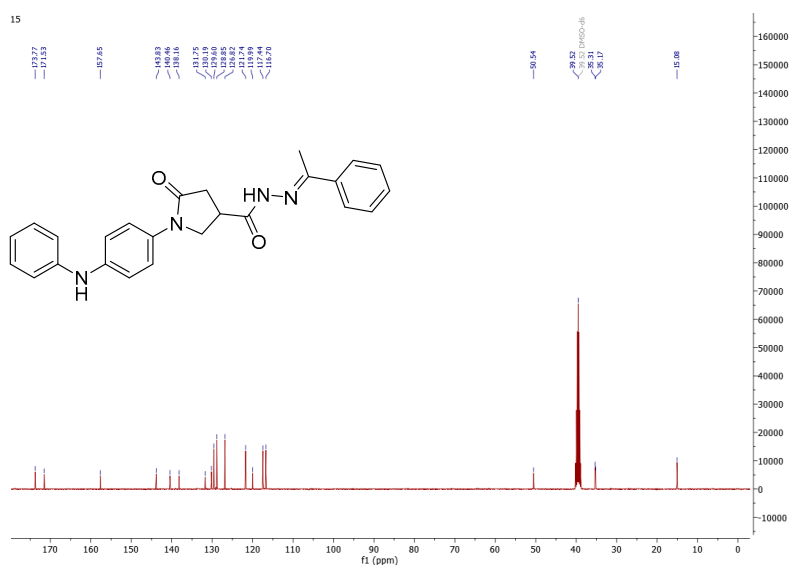

16

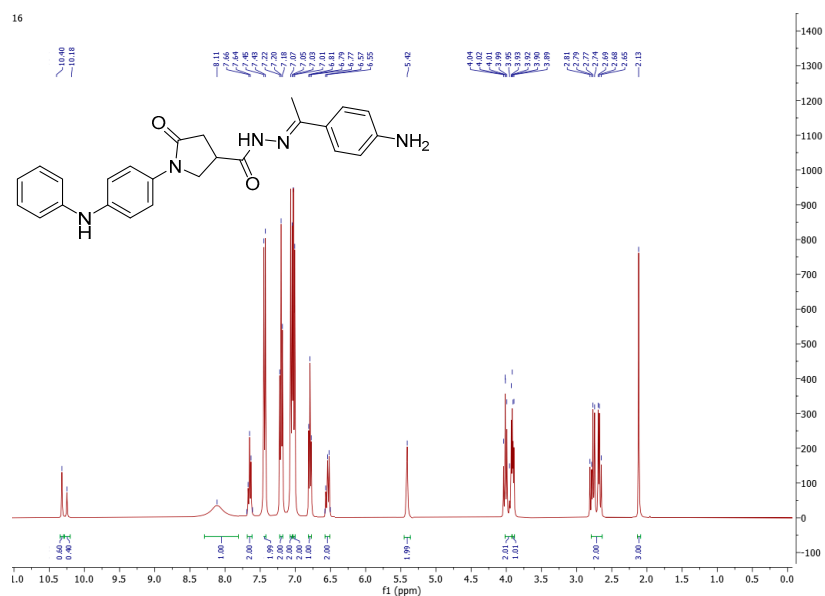

**Figure S43.**  $^1\text{H}$  NMR (400 MHz,  $\text{DMSO-d}_6$ ) spectrum of **16**

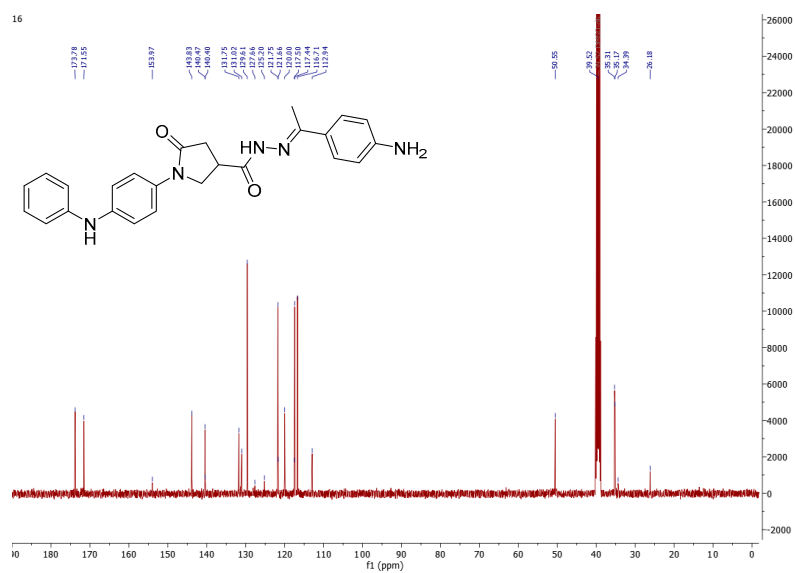

**Figure S44.**  $^{13}\text{C}$  NMR (101 MHz,  $\text{DMSO-d}_6$ ) spectrum of **16**

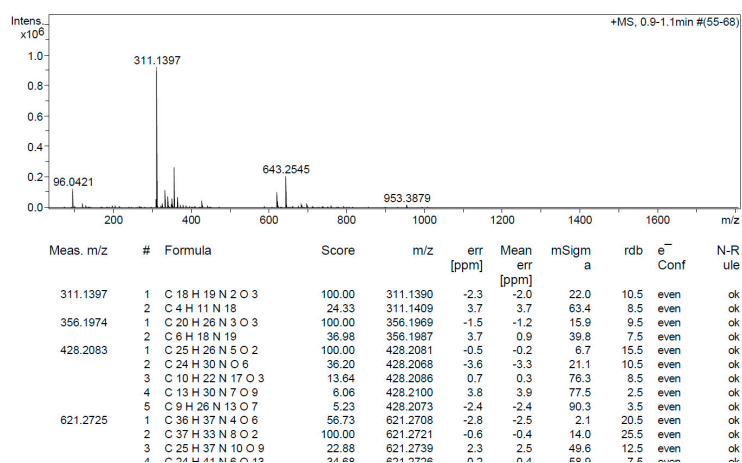

**Figure S45.** HRMS spectrum of **16**

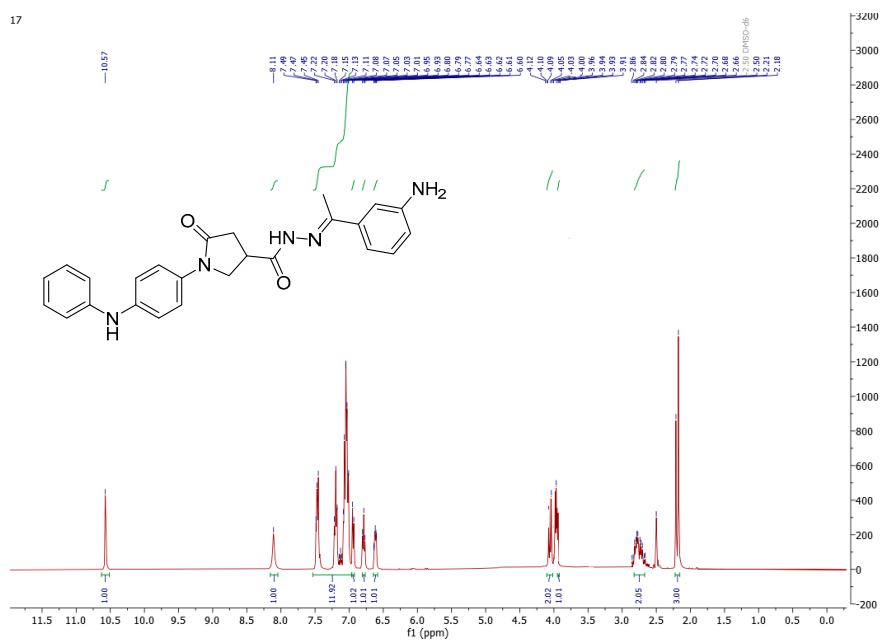

Figure S46.  $^1\text{H}$  NMR (400 MHz,  $\text{DMSO-d}_6$ ) spectrum of 17

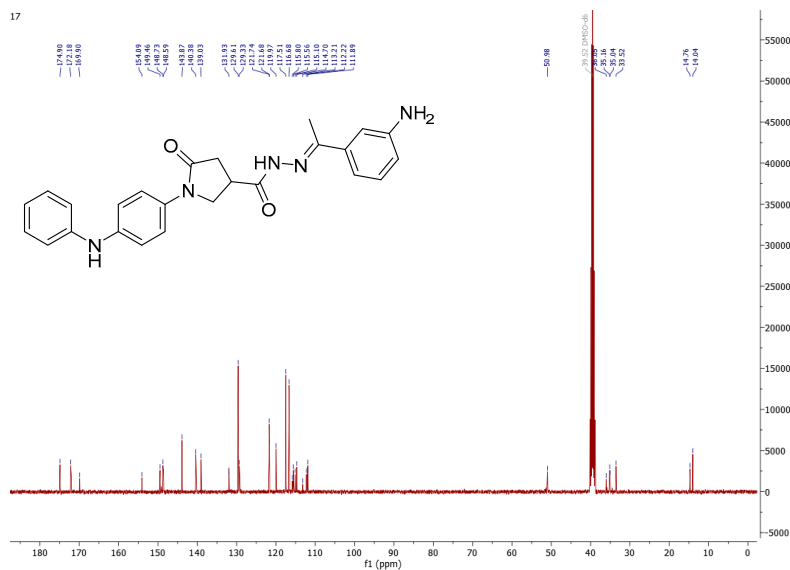

Figure S47.  $^{13}\text{C}$  NMR (101 MHz,  $\text{DMSO-d}_6$ ) spectrum of 17

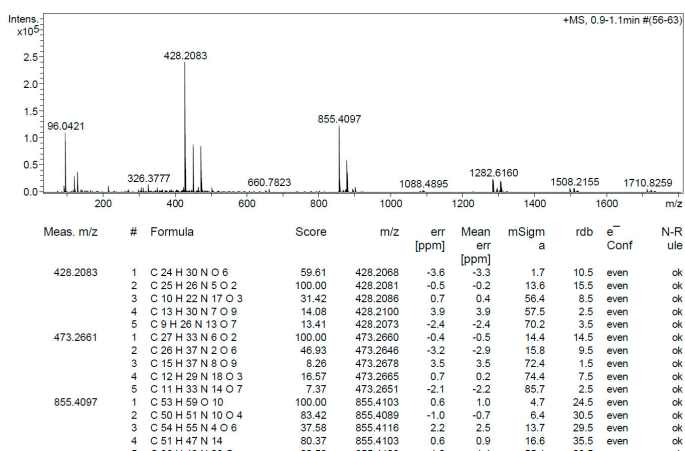

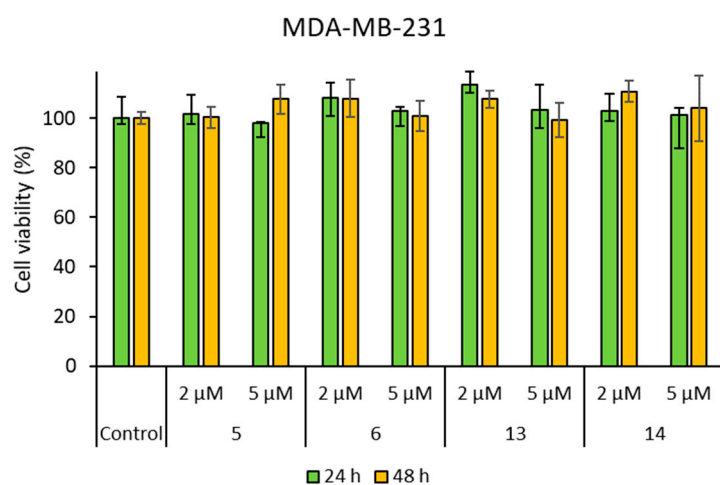

**Figure S49.** The effect of 2 and 5  $\mu\text{M}$  compound concentration on MDA-MB-231 cell line viability after 24 and 48 h.

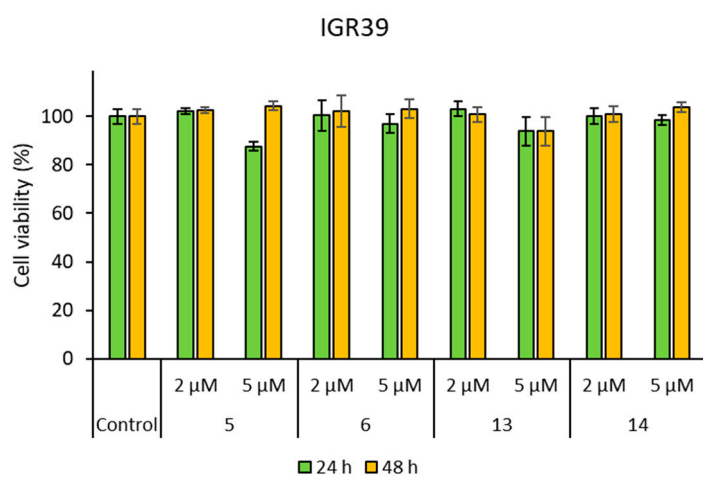

**Figure S50.** The effect of 2 and 5  $\mu\text{M}$  compound concentration on IGR39 cell line viability after 24 and 48 h.

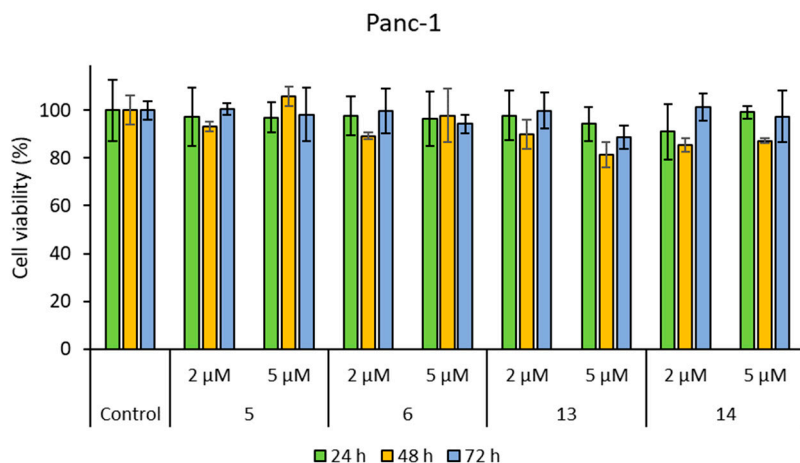

**Figure S51.** The effect of 2 and 5 µM compound concentration on Panc-1 cell line viability after 24, 48, and 72 h.

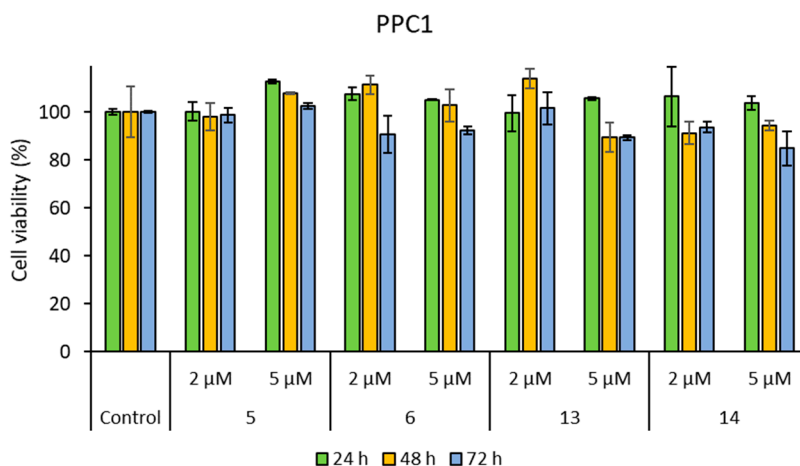

**Figure S52.** The effect of 2 and 5 µM compound concentration on PPC1 cell line viability after 24, 48, and 72 h.

**Procedure S1.** Evaluation of 2 and 5 µM compound concentration effect on cell line viability.

The effect of 10 µM compounds on cell viability was studied using 3-(4,5-dimethylthiazol-2-yl)-2,5-diphenyltetrazolium bromide (MTT; Sigma-Aldrich Co., St Louis, MO, USA) assay. IGR39, MDA-MB-231, Panc-1 and PPC1 cells were seeded in 96-well plates (Corning) in triplicates at a volume of 100 µL at  $4 \times 10^3$  cells/well. After 24 h, the cells were treated with 2 and 5 µM of compounds **5**, **6**, **13**, and **14**. After 24 h, 48 h (all cell lines) and 72 h (Panc-1 and PPC1 cells), the MTT reagent has been added and cells were incubated for 4 h. Then the medium was aspirated, and the formed formazan crystals were dissolved in 100 µL DMSO (Sigma-Aldrich Co., St. Louis, MO, USA). The absorbance was measured at 570 and 630 nm using a multi-detection microplate reader. Compound effect on cell viability was calculated according to a formula:

$$\text{Relative cell viability (\%)} = \frac{A - A_0}{A_{NC} - A_0}$$

Where:

A – mean of absorbance of the tested compound,

A<sub>0</sub> – mean of absorbance of blank (no cells, positive control),

A<sub>NC</sub> – mean of absorbance of negative control (only cells, no treatment).
